# Supplementary material for: An automated method for the analysis of food intake behaviour in Caenorhabditis elegans
Source: PubMed Central journal article supplement (PMC5832146; doi:10.1038/s41598-018-21964-z), 2018-02-26
Supplement: 41598_2018_21964_MOESM1_ESM.pdf [file 41598_2018_21964_MOESM1_ESM.pdf]

## **Supplementary Information**

### **An automated method for the analysis of food intake behaviour in *Caenorhabditis elegans***

M<sup>a</sup> Jesús Rodríguez-Palero, Ana López-Díaz, Roxane Marsac, José-Eduardo Gomes,  
María Olmedo and Marta Artal-Sanz

**Figure S1**

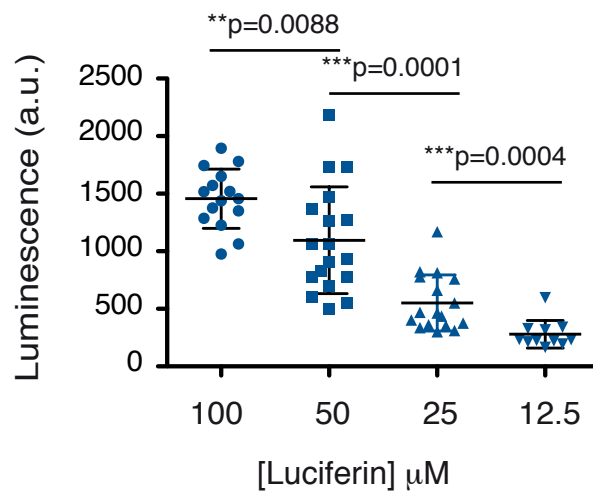

**Figure S1.** Mean luminescence signal from single LUC::GFP transgenic animals at the young-adult stage, at different concentrations of luciferin. Error bars show s.d. All experiments were done using strains carrying the integrated transgene *feIs4*.

**Figure S2**

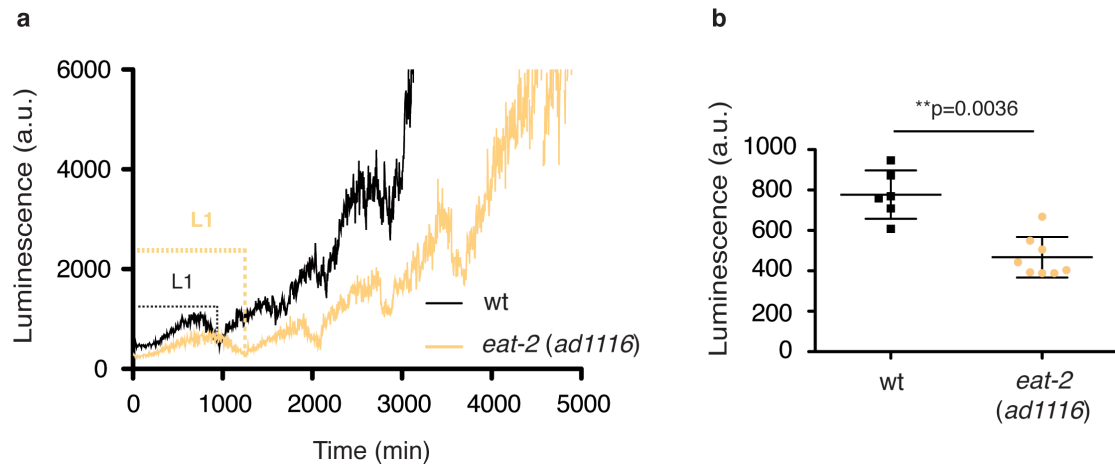

**Figure S2.** Luminescence signal reports food intake of populations of worms. (a) Bioluminescence signal for wild-type and *eat-2(ad1116)* mutant animals, transgenic for LUC::GFP, over the course of development. The graph shows data from a representative well with twenty worms. (b) Mean luminescence signal of wild type and *eat-2 (ad1116)* population of animals, transgenic for LUC::GFP, at the L1 larval stage. Error bars show s.d. All experiments were done using strains carrying the integrated transgene *fels4*.

**Figure S3**

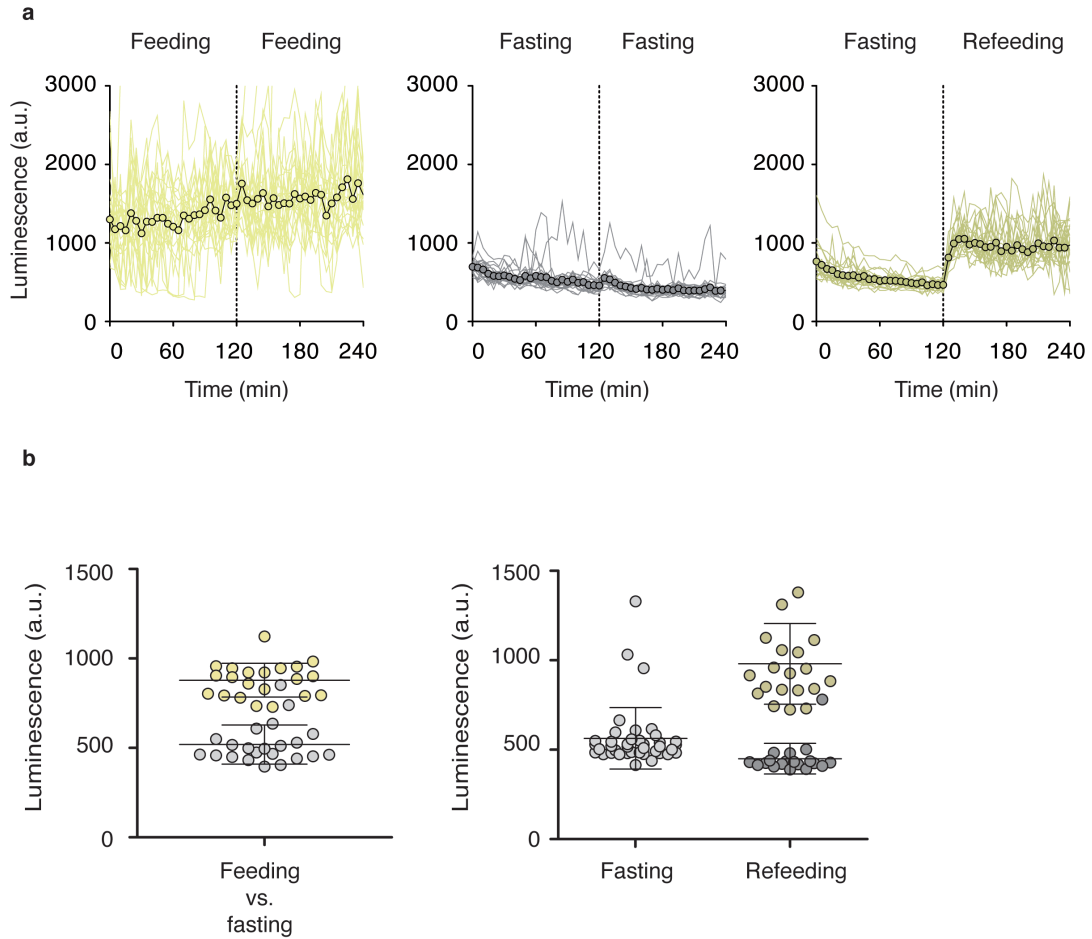

**Figure S3.** a) Luminescence signal over the periods of fasting and refeeding. Measurements are performed at 5-min intervals. b) Replicate of the experiment in Figure 2b. Error bars show s.d. All experiments were done using a strain carrying the integrated transgene *sevIs1*.

**Figure S4**

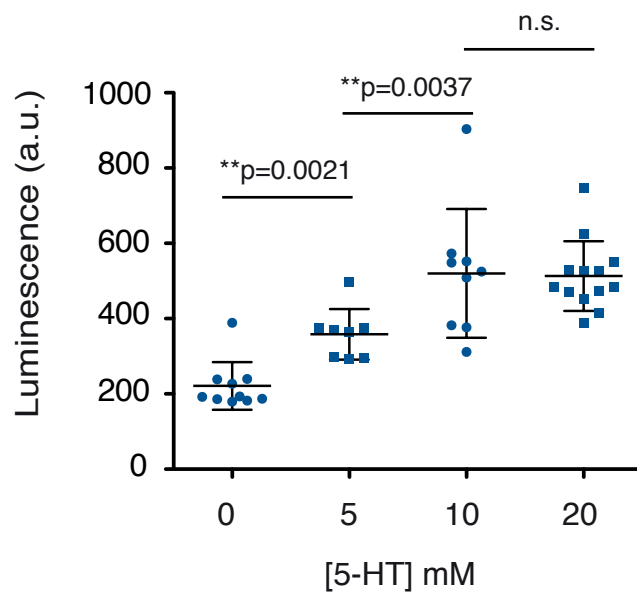

**Figure S4.** Mean luminescence signal from single LUC::GFP transgenic animals at the young-adult stage, at different concentrations of serotonin. Error bars show s.d. All experiments were done using strains carrying the integrated transgene *sevIs1*.

**Table S1.** Mean GFP fluorescence intensity in several metabolically compromised worm strains.

| Strain                                                         | GFP intensity <sup>1</sup> | s.d.      | n <sup>2</sup> | % <sup>3</sup> | P value <sup>4</sup> |
|----------------------------------------------------------------|----------------------------|-----------|----------------|----------------|----------------------|
| <i>sevIs2[Psur-5::luc+::gfp]</i>                               | 9,532E+06                  | 1,729E+06 | 118            | -7,93%<br>(3)  | 0,0002               |
| <i>sgk-1(ft-15) X; sevIs2[Psur-5::luc+::gfp]</i>               | 8,776E+06                  | 1,695E+06 | 132            |                |                      |
| <i>feIs4[Psur-5::luc+::gfp; rol-6(su1006)]V</i>                | 2,294E+06                  | 6,981E+05 | 123            | -45,47<br>(2)  | < 0.0001             |
| <i>sgk-1(ok538)X; feIs4[Psur-5::luc+::gfp; rol-6(su1006)]V</i> | 1,251E+06                  | 5,342E+05 | 110            |                |                      |
| <i>sevIs1[Psur-5::luc+::gfp]X</i>                              | 8,567E+06                  | 1,987E+06 | 141            | 73,92<br>(3)   | < 0.0001             |
| <i>daf-2(e1370)III; sevIs1[Psur-5::luc+::gfp]X</i>             | 1,490E+07                  | 2,730E+06 | 125            |                |                      |
| <i>sevIs1[Psur-5::luc+::gfp]X</i>                              | 7,819E+06                  | 1,935E+06 | 200            | 11,23%<br>(4)  | < 0.0001             |
| <i>daf-16(mu86); sevIs1[Psur-5::luc+::gfp]X</i>                | 8,697E+06                  | 1,997E+06 | 178            |                |                      |
| <i>sevIs1[Psur-5::luc+::gfp]X</i>                              | 7,926E+06                  | 2,158E+06 | 177            | 29,32%<br>(4)  | < 0.0001             |
| <i>age-1(mg305)II; sevIs1[Psur-5::luc+::gfp]X</i>              | 1,025E+07                  | 2,188E+06 | 91             |                |                      |

<sup>1</sup> Mean of the total GFP fluorescence intensity (a.u.).

<sup>2</sup> Total number of worms analyzed.

<sup>3</sup> Percentage of difference from the wild-type control. The number of independent replicates is shown in parentheses.

<sup>4</sup> P values were calculated using the nonparametric Mann-Whitney U test, two-tailed.
